# Supplementary material for: Exclusive excited state intramolecular proton transfer from a 2-(2′-hydroxyphenyl)benzimidazole derivative
Source: Royal Society of Chemistry journal article supplement (doi:10.1039/c6ra11780e), 2016-01-01
Supplement: c6ra11780e1.pdf [file c6ra11780e1.pdf]

**Exclusive Excited State Intramolecular Proton Transfer from a  
2-(2'-Hydroxyphenyl)benzimidazole Derivative**

Santosh Kumar Behera<sup>a</sup>, G. Sadhuragiri,<sup>b</sup> Palani Elumalai,<sup>b</sup> M. Sathiyendiran<sup>b</sup>, and G.

Krishnamoorthy<sup>a\*</sup>

<sup>a</sup>Department of Chemistry, Indian Institute of Technology Guwahati, Assam 781039, India

<sup>b</sup>School of Chemistry, University of Hyderabad, Hyderabad - 500 046, India

Email ID: [gkrishna@iitg.ernet.in](mailto:gkrishna@iitg.ernet.in)

**Electronic supplementary information**

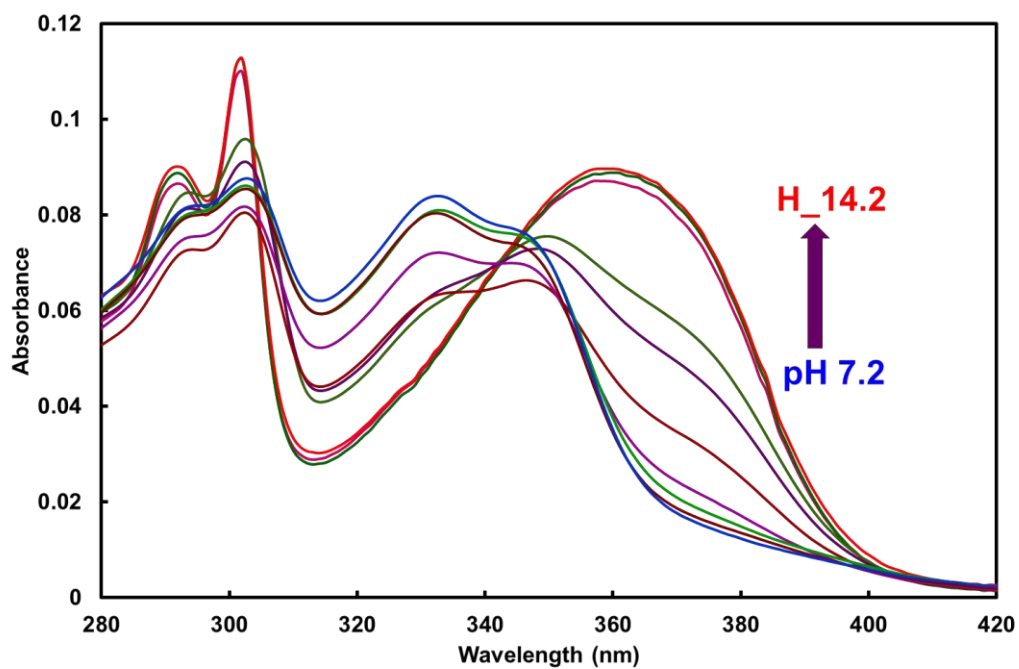

**Fig. S1** Absorption spectra of bis-HPBI in aqueous medium in pH /H\_ range 7.2 to 14.2.

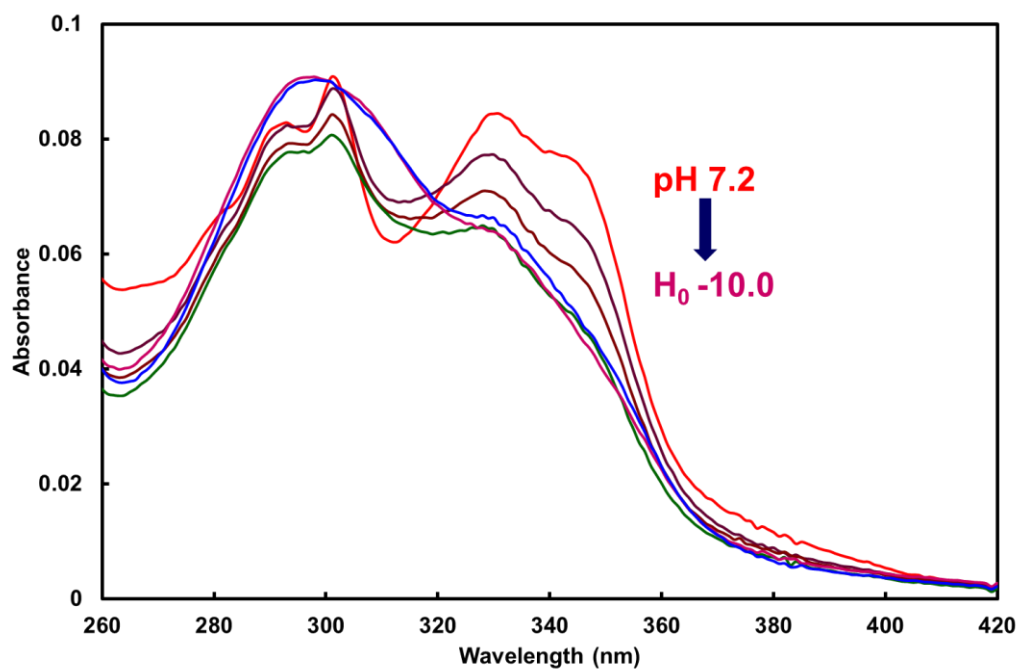

**Fig. S2** Absorption spectra of bis-HPBI in aqueous medium in pH /H\_0 range 7.2 to -10.

**Table S1** Fluorescence Wavelength Maximum ( $\lambda_{\text{max}}^{\text{fl}}$ , nm) and Lifetimes ( $\tau$ , ns) of bis-HPBI in Aqueous Medium at Different Conditions.

| <b>H_/pH/H<sub>0</sub></b> | <b><math>\lambda_{\text{max}}^{\text{fl}}</math></b> | <b><math>\tau</math></b> |
|----------------------------|------------------------------------------------------|--------------------------|
| <b>H_ 14.2</b>             | 435                                                  | 3.97                     |
| <b>pH 11.0</b>             | 435                                                  | 0.31                     |
|                            | 470                                                  | 2.52                     |
| <b>pH 7.2</b>              | 475                                                  | 1.64                     |
| <b>pH 1.0</b>              | 388                                                  | 0.38                     |
|                            | 360                                                  | 1.89                     |
| <b>H<sub>0</sub> -7.3</b>  | 388                                                  | 0.28                     |
|                            | 455                                                  | 2.88                     |
| <b>H<sub>0</sub> -10.0</b> | 388                                                  | 1.18                     |
